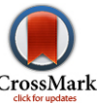

# Endothelial Depletion of *Acvrl1* in Mice Leads to Arteriovenous Malformations Associated with Reduced Endoglin Expression

Simon Tual-Chalot<sup>1</sup><sup>✉</sup>, Marwa Mahmoud<sup>1</sup><sup>✉</sup><sup>‡a</sup>, Kathleen R. Allinson<sup>1</sup>, Rachael E. Redgrave<sup>1</sup>, Zhenhua Zhai<sup>1</sup><sup>‡b</sup>, S. Paul Oh<sup>2</sup>, Marcus Fruttiger<sup>3</sup>, Helen M. Arthur<sup>1</sup><sup>\*</sup>

**1** Institute of Genetic Medicine, Newcastle University, Newcastle, United Kingdom, **2** Department of Physiology, University of Florida, Gainesville, Florida, United States of America, **3** UCL, Institute of Ophthalmology, London, United Kingdom

## Abstract

Rare inherited cardiovascular diseases are frequently caused by mutations in genes that are essential for the formation and/or function of the cardiovascular system. Hereditary Haemorrhagic Telangiectasia is a familial disease of this type. The majority of patients carry mutations in either Endoglin (*ENG*) or *ACVRL1* (also known as *ALK1*) genes, and the disease is characterized by arteriovenous malformations and persistent haemorrhage. *ENG* and *ACVRL1* encode receptors for the TGF $\beta$  superfamily of ligands, that are essential for angiogenesis in early development but their roles are not fully understood. Our goal was to examine the role of *Acvrl1* in vascular endothelial cells during vascular development and to determine whether loss of endothelial *Acvrl1* leads to arteriovenous malformations. *Acvrl1* was depleted in endothelial cells either in early postnatal life or in adult mice. Using the neonatal retinal plexus to examine angiogenesis, we observed that loss of endothelial *Acvrl1* led to venous enlargement, vascular hyperbranching and arteriovenous malformations. These phenotypes were associated with loss of arterial Jag1 expression, decreased pSmad1/5/8 activity and increased endothelial cell proliferation. We found that Endoglin was markedly down-regulated in *Acvrl1*-depleted ECs showing endoglin expression to be downstream of *Acvrl1* signalling *in vivo*. Endothelial-specific depletion of *Acvrl1* in pups also led to pulmonary haemorrhage, but in adult mice resulted in caecal haemorrhage and fatal anaemia. We conclude that during development, endothelial *Acvrl1* plays an essential role to regulate endothelial cell proliferation and arterial identity during angiogenesis, whilst in adult life endothelial *Acvrl1* is required to maintain vascular integrity.

**Citation:** Tual-Chalot S, Mahmoud M, Allinson KR, Redgrave RE, Zhai Z, et al. (2014) Endothelial Depletion of *Acvrl1* in Mice Leads to Arteriovenous Malformations Associated with Reduced Endoglin Expression. PLoS ONE 9(6): e98646. doi:10.1371/journal.pone.0098646

**Editor:** Vesa Kaartinen, University of Michigan, United States of America

**Received:** December 19, 2013; **Accepted:** May 6, 2014; **Published:** June 4, 2014

**Copyright:** © 2014 Tual-Chalot et al. This is an open-access article distributed under the terms of the Creative Commons Attribution License, which permits unrestricted use, distribution, and reproduction in any medium, provided the original author and source are credited.

**Funding:** This study was supported by funding from the Wellcome Trust, the British Heart Foundation and National Institutes of Health grant HL64024. The funders had no role in study design, data collection and analysis, decision to publish, or preparation of the manuscript.

**Competing Interests:** The authors have declared that no competing interests exist.

\* E-mail: helen.arthur@ncl.ac.uk

✉ These authors contributed equally to this work.

‡a Current address: Centre for Cardiovascular Biology & Medicine, UCL Medical School, London, United Kingdom,

‡b Current address: Cancer and Vascular Biology Laboratory, Liaoning Medical University, Jinzhou City, Liaoning Province, China

## Introduction

ACVRL1 (activin receptor like kinase1) is a TGF $\beta$ /BMP type I receptor that is required for angiogenesis *in vivo* [1]. It is a membrane protein that is expressed on endothelial cells (ECs), and has a particularly strong affinity for BMP9 and BMP10 ligands [2]. BMP9 (which is present in serum) has been shown to signal through ACVRL1 in ECs and to inhibit angiogenesis in a context specific manner [3,4]. Furthermore, binding of BMP9 to ACVRL1 (in complex with the BMP type 2 receptor) leads to phosphorylation of SMAD1/5/8 transcription factors which regulate downstream gene expression. Patients who are heterozygous for loss of function mutations in *ACVRL1* develop the vascular disorder Hereditary Haemorrhagic Telangiectasia (HHT) type 2 [5]. A very similar disease (HHT type 1) is caused by mutations in the TGF $\beta$ /BMP co-receptor endoglin. Type I and type 2 HHT form the majority of cases of this disease which is characterised by persistent intermittent bleeding from small vascular lesions in the

nose and GI tract and by numerous sporadic larger arteriovenous malformations (AVMs) caused by direct connections between arteries and veins that can affect lung, brain and liver [6]. This clinical phenotype points to the importance of ACVRL1 and endoglin in vascular development and in maintaining blood vessel integrity.

When *Acvrl1* is depleted from ECs during late foetal development, neonatal mice show systemic enlargement of arteriovenous interconnections, consistent with extensive shunting from arteries to veins [7]. On the other hand, ubiquitous loss of *Acvrl1* in adult mice leads to gastrointestinal bleeding that is also a feature of HHT2 patients [7]. Real time imaging following dermal injury revealed *de novo* AVM formation in these mice, and pointed to angiogenesis as a trigger of abnormal vessel remodelling in the absence of *Acvrl1* in the adult vasculature [7]. This was recently confirmed in a study that showed VEGF stimulated angiogenesis in the brain led to the development of abnormal vessels resembling AVMs in mice with endothelial specific loss of *Acvrl1*, but not in

controls [8]. Cranial AVMs that develop following loss of *Acvr1l* in a zebrafish model were associated with an abnormal increase in endothelial cell proliferation, which occurs partly in response to blood flow [9,10]. Furthermore, recent work, using adenoviral delivery of the extracellular domain of human ACVRL1 to act as a ligand trap in neonatal mice, showed that removal of BMP9 (and other *Acvr1l*-binding ligands) in the mouse circulation led to hyperbranching of the retinal plexus, consistent with defects in Notch signalling [11]. However, the effect of losing the endogenous endothelial *Acvr1l* receptor in this model has not yet been addressed. We therefore derived a mouse model in which we can trigger endothelial-specific depletion of *Acvr1l* in the first week of postnatal life to investigate its role during angiogenesis *in vivo*. In addition, in the context of HHT, we aimed to compare the vascular phenotype following specific depletion of *Acvr1l* from vascular ECs (*Acvr1l*-iKO<sup>c</sup>) in this study, with the previously reported phenotype resulting from endothelial specific loss of endoglin (*Eng*-iKO<sup>c</sup>) [12].

## Methods

### Ethics Statement

All animal experiments were performed under UK home office licence with approval from Newcastle University ethical review committee.

### Mice

Floxed *Acvr1l* (*Acvr1l*<sup>f/f</sup>) mice, and endothelial-specific tamoxifen inducible Cre line (*Cdh5(PAC)Cre*<sup>ERT2</sup>) were genotyped by genomic PCR as previously described [12–15]. Neonatal *Cdh5(PAC)Cre*<sup>ERT2</sup>;*Acvr1l*<sup>f/f</sup> mice and *Acvr1l*<sup>f/f</sup> control littermates were injected subcutaneously with 0.3 mg tamoxifen at postnatal day (P)4 and tissues were harvested at P6, no later than 40 hours post injection. To inactivate *Acvr1l* in adult life, *Cdh5(PAC)Cre*<sup>ERT2</sup>;*Acvr1l*<sup>f/f</sup> mice aged 10 to 12 weeks were injected intraperitoneally with 2 mg tamoxifen on two occasions, separated by 1 day; tissues and blood were harvested for analysis 10 days after the first injection. Controls were tamoxifen treated *Acvr1l*<sup>f/f</sup> littermates. To reduce variation, only male mice were used in the adult part of the study as there is a gender difference in response to ubiquitous *Acvr1l* depletion in adult life [7].

### Retinal immunofluorescence staining and analysis

Mouse eyes were enucleated immediately post-mortem, and retinas prepared and stained as previously described [12,16]. Essentially retinas were briefly fixed in 4% (w/v) paraformaldehyde in PBS prior to staining. Vascular staining was performed with Alexa488-conjugated B. *Simplicifolia* isolectin B4 (Invitrogen) and immunostaining with primary antibodies to alpha smooth muscle actin (anti- $\alpha$ SMA-Cy3, Sigma), desmin (Millipore), Jag1 (Santa Cruz), CD31 and Endoglin (BD biosciences), EphB4 and *Acvr1l* (R&D) [12]. Secondary antibodies conjugated with Alexa594 or Alexa488 (Invitrogen) were used to detect unconjugated primary antibodies. Analysis of branchpoints, filopodia, tip cells and the percentage area covered by isolectin-positive endothelial cells were calculated according to previously reported guidelines [17]. Quantitation of AVM incidence was calculated from fields of view (5300  $\mu$ m $\times$ 4460  $\mu$ m) using images from 24 whole retinas, as previously described [12]. To measure venous diameters, at least 3 veins per retina were measured at 3 positions (200  $\mu$ m, 250  $\mu$ m and 300  $\mu$ m) from the centre of the retina, and 4 retinas were analysed per group. Pericyte coverage of the central vascular capillaries was calculated from 5 fields of view (355  $\mu$ m $\times$ 265  $\mu$ m) per retina using maximum intensity projection

confocal images and NIS-Element software (Nikon). Pericyte coverage was calculated as the ratio of area covered by desmin positive muscle cells and normalised to the area covered by CD31-positive endothelial cells. To detect endothelial cell proliferation, pups were injected subcutaneously with thymidine analogues, either 50  $\mu$ g EdU or 100  $\mu$ g BrdU per gram body weight two hours prior to harvesting tissues. To visualise EdU positive cells, retinas were stained using Click-iT chemistry according to manufacturer's instructions (Click-iT imaging kit, Invitrogen). To detect BrdU, retinas were treated briefly with 6 mol/L HCl to denature the DNA prior to staining with anti-BrdU-Alexa594 (Invitrogen). A total of 4 fields of view (1420 $\times$ 1060  $\mu$ m) were analysed in the central region of each retina and the number of proliferating ECs was normalised to isolectin stained vessel area for 6 control and 6 *Acvr1l*-iKO<sup>c</sup> retinas. Visualization of ECs with anti-podocalyxin (R&D) to detect the apical endothelial surface and anti-phospho-Smad1/5/8 (NEB) to detect Smad1/5/8 activation was performed following heat-based antigen retrieval on paraffin retinal sections as previously described [18]. Stained retinas were flat mounted in prolong gold mountant including dapi for nuclear staining, (Invitrogen) and examined using a NikonA1R confocal microscope. Quantitation of pSmad1/5/8 staining intensity using NIS-elements software was performed on 56 endothelial nuclei from 3 *Acvr1l*-iKO<sup>c</sup> mutant retinas and 65 endothelial nuclei from 3 littermate controls.

### Analysis of Mouse Lung and Caecal Tissue

Lungs and caeca were fixed in 4% paraformaldehyde or formalin, embedded in paraffin, sectioned and stained with haematoxylin and eosin (H&E) and mounted in histomount. Alternatively, paraffin sections were subjected to heat-based antigen retrieval and stained with isolectin B4 and anti- $\alpha$ SMA, then mounted in prolong gold (Invitrogen). Tissues were examined using a Zeiss Axioimager microscope.

### Purification of ECs from tissues

Retinal ECs, or primary ECs from lung tissue, were isolated from wild-type and *Acvr1l*-iKO<sup>c</sup> neonates (aged P6). Freshly dissected retinal tissue was finely minced and incubated in 10 mL Dulbecco modified Eagle medium containing 200 U/ml collagenase I (Gibco) for 45 minutes at 37°C. The cells were filtered through a 40  $\mu$ m nylon mesh, recovered by centrifugation (500 g for 5 minutes at 4°C) and resuspended in Buffer 1 (0.1% bovine serum albumin, 2 mM EDTA, pH7.4 in PBS). ECs were incubated with anti-CD31 (BD Pharmingen)-coupled magnetic beads (Invitrogen) for 30 minutes at 4°C and isolated from the cell mixture using a magnetic separator (Dyna). Bead-EC conjugates were washed 5 times with Buffer 1 and centrifuged for 5 minutes at 3400 g at 4°C, and the supernatant removed. The purified retinal ECs were then snap frozen and stored at -80°C until required. Total RNA was extracted from purified retinal ECs using the RNeasy Micro kit (Qiagen). RNA concentration and purity was calculated by measuring the absorbance at 260 and 280 nm using a Nanodrop spectrophotometer (ThermoScientific) and 100 ng of the total RNA was used to prepare template cDNA using RT2 First Strand Kit (Qiagen), according to manufacturers' instructions. Purified ECs from at least 5 *Acvr1l*-iKO<sup>c</sup> and 5 control retinas were used to prepare cDNA in four independent experiments using HotStarTaq DNA Polymerase Kit (Qiagen). PCR was used to establish EC purification by comparing *Cdh5* and CD31 expression in EC and non-EC fractions after cell sorting. Ve-cadherin (*Cdh5*) transcripts were detected using forward primer 5'-ACCGTGGGTGTGTGCAAG-3' and reverse primer 5'-TTTCTTCACGTCGATCATGGTG-3' and expres-

sion of CD31 (Pecam1) was determined using forward primer 5'-AAGCGGTGCGTGAATGACAC-3' and reverse primer 5'-TTTGGCTGCAACTATTAAGGTG-3'. Levels of  $\beta$ -actin were determined using the forward primer 5'-TGAACCCCTAAGGC-CAACCGTG-3' and the reverse primer 5'-GCTCAGTAGCTCTTCTCCAGGG-3'. PCR was performed with 35 cycles of denaturation (30 s at 97°C), annealing (30 s at 58.2°C), and extension (90 s at 72°C), followed by a final extension of 5 min at 72°C for CD31/Pecam1 and  $\beta$ -actin. Cycle conditions for *Cdh5* were 35 cycles (97°C, 64°C, 72°C).

Mouse neonatal lung ECs were prepared as previously described [19]. Briefly, lung tissue from pups was cut into small fragments and digested with collagenase/dispase solution (Roche) and dispersed mechanically into single-cell suspension. ECs were purified from cell suspension using anti-CD31 antibody conjugated to Dynabeads using a magnetic particle concentrator and cultured to passage 3 in Endothelial Cell Basal Medium MV2 (PromoCell). Cells were then seeded onto multiwell slides and immunostained for CD31, endoglin and Acvr11 expression before imaging with a Zeiss Axioimager and digital camera.

### Q-PCR

RNA was prepared from retinal ECs (P6) using the RNAeasy Micro kit (Qiagen) and RNA concentration and purity assessed using a Nanodrop spectrophotometer as above. cDNA was made using RT2 First Strand Kit (Qiagen), according to manufacturers' instructions. Q-PCR was performed using a SYBR Green-based real time PCR custom array (SABioscience) of 85 genes involved in angiogenesis. ECs from at least 5 Acvr11-iKO<sup>c</sup> and 5 control retinas were used to prepare cDNA in four replicate experiments for the custom array. For data analysis, the RT2 Profiler PCR Array software was used and statistical analyses performed. This package uses  $\Delta\Delta C_t$ -based fold change calculations with respect to the average  $C(t)$  of 3 housekeeping genes: *B2m*, *Gapdh* and *Actb* and the Student's t-test to calculate two-tail, equal variance p-values.

### Oxygen saturation and blood parameters

Oxygen saturation was measured in adult mice on the day before the first tamoxifen injection by pulse oxymetry (MouseOx; Starr Life Sciences Corp.), and over the subsequent 11 days. The mouse was anaesthetised by isoflurane mixed with medical air, and the sensor was placed on a hind limb. Blood chemistry parameters were obtained using blood harvested by cardiac puncture from anaesthetised adult mice (10 days after the first tamoxifen injection) and analysed on a CC8+ cartridge (Abaxis) using an i-STAT portable reader (Abbott Laboratories, Princeton, NJ).

### Statistical Analysis

Data were analysed by two-way analysis of variance, and paired Student's t-test using Graphpad Prism (version 5, Graphpad Software Inc., La Jolla, CA, USA). Data are expressed as mean  $\pm$  SEM, and  $p < 0.05$  was considered to be statistically significant.

## Results

### Endothelial specific depletion of Acvr11 in neonates leads to rapid mortality associated with pulmonary haemorrhage

Acvr11 is expressed in the veins, arteries and capillaries of the neonatal retina at postnatal day (P) 6 (Figure 1A,B). Tamoxifen injection of *Cdh5(PAC)Cre<sup>ERT2</sup>;Acvr11<sup>f/f</sup>* neonatal mice led to

efficient loss of Acvr11 protein expression in the neonatal retina to generate Acvr11-iKO<sup>c</sup> mice (Figure 1C,D). By 48 hours post injection, Acvr11-iKO<sup>c</sup> showed severe respiratory distress leading to rapid mortality. The timing was therefore optimised to examine neonates at 40 hours post tamoxifen injection, which was after Acvr11 protein depletion, but before the severe adverse symptoms began. Examination of Acvr11-iKO<sup>c</sup> neonatal lungs revealed haemorrhage from the distal small capillaries, which was absent in controls, but we observed no detectable loss of vascular smooth muscle cells (vSMCs) from the pulmonary blood vessels (Figure S1).

### Endothelial specific depletion of Acvr11 in neonates leads to retinal arteriovenous malformations and hyperbranching

We chose to investigate the effect of endothelial depletion of Acvr11 in the retinal vasculature using a similar approach to one we had used previously [12]. This approach has a number of advantages. First, the neonatal retinal plexus undergoes a well characterised process of vascularisation in the first week of life allowing identification of any aberrant angiogenesis events in the absence of endothelial Acvr11 [20]. Second, individual endothelial cells can be visualised within a simple two dimensional vascular permitting analysis of key parameters such as cell proliferation, smooth muscle coverage, arterial and venous identity as well as cell-specific signalling in vivo. Using this approach we identified numerous vessel abnormalities in the Acvr11-iKO<sup>c</sup> mutants compared with controls, including AVMs, enlarged veins and hyperbranching of the capillary plexus (Figure 1E–H). Approximately 60% of Acvr11-iKO<sup>c</sup> neonatal retinas showed AVMs (14/24 retinas); and when present there were usually multiple AVMs (average number per retina = 2.7). Even more frequently, enlarged veins were observed in 70% of the Acvr11-iKO<sup>c</sup> retinas (Figure 1F & H); the mean vein width was 23.99  $\pm$  1.4  $\mu$ m in control retinas and 42.62  $\pm$  2.3  $\mu$ m in Acvr11-iKO<sup>c</sup> retinas ( $p < 0.001$ ). Increased vascular branching (100% incidence) was associated with higher vascular density (Figure 2B) and greater numbers of filopodia, consistent with the presence of increased numbers of tip cells in the central region of the plexus, an area where the tip cell phenotype is normally suppressed (Figure 2). There was no significant difference between Acvr11-iKO<sup>c</sup> and control retinas in progression of the plexus towards the edge of the retina (Figure S2) suggesting there was no defect in migration. Pericyte coverage of the arteries and veins was normal in Acvr11-iKO<sup>c</sup> retinas, but capillaries showed decreased pericyte coverage in Acvr11-iKO<sup>c</sup> mutants compared with controls (Figure 3).

As AVMs can be caused by loss of arterial and venous identity, we next investigated whether arteries and veins of the Acvr11-iKO<sup>c</sup> retinal plexus retained expression of key venous and arterial molecular markers. We found that expression of the venous marker, EphB4, was retained in the veins of Acvr11-iKO<sup>c</sup> retinas (Figure 4A,B), but there was markedly reduced jagged 1 (*Jag1*) expression in the mutant arteries compared with controls, suggesting loss of arterial identity (Figure 4C,D). Interestingly, AVMs in the Acvr11 deficient retinas also expressed the venous marker EphB4, consistent with AVMs possessing a venous identity (Figure 4B). Using thymidine analogues to monitor proliferating cells we observed there was increased EC proliferation in AVMs, as well as in the enlarged veins, in comparison with littermate controls, pointing to an abnormal increase in EC proliferation underlying the enlargement of both veins and AVMs in Acvr11-iKO<sup>c</sup> retinas (Figure 4E–H).

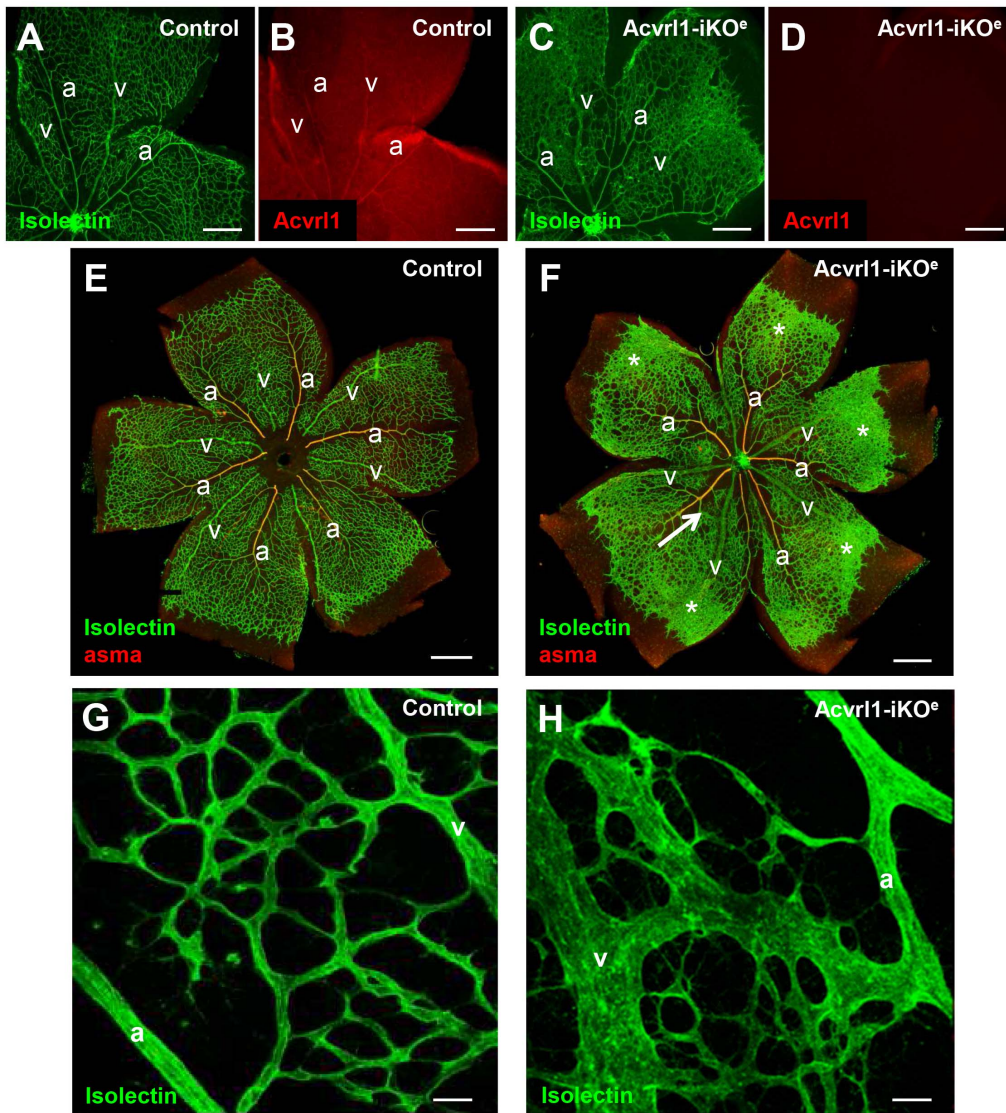

**Figure 1. Loss of endothelial *Acvr11* expression leads to abnormalities in the neonatal retinal vascular plexus.** *Acvr11* expression in control retinas at P6 is seen in veins, arteries and capillaries (A,B) and is efficiently knocked down 40 hours after tamoxifen injection (C,D). Loss of *Acvr11* protein in endothelial cells in the *Acvr11*-iKO<sup>e</sup> mouse leads to AVMs (F, arrow), enlarged veins (compare veins in F and E as well as H and G) and hyperbranching (F, asterisks). Arteries are muscularised in both *Acvr11*-iKO<sup>e</sup> and control retinas, as indicated by staining for alpha smooth muscle actin (aSMA) positive smooth muscle cells (E,F). An AVM at higher magnification (H) contrasts with the normal capillary network seen in control retinas (G). Abbreviations a, artery; v, vein. Scale bar = 400  $\mu$ m A–D; 500  $\mu$ m E and F; 25  $\mu$ m G and H. doi:10.1371/journal.pone.0098646.g001

### Endothelial specific depletion of *Acvr11* in neonates leads to reduced phospho-activation of Smad1/5/8 and changes in downstream gene expression

As *Acvr11* normally responds to circulating ligands by phosphorylating Smad1/5/8, we used antibodies to detect the phosphorylated form of Smad1/5/8 in *Acvr11*-KO<sup>e</sup> retinas and found that pSmad1/5/8 activity was significantly reduced in *Acvr11*-KO<sup>e</sup> ECs compared with controls (Figure 5A–C). We therefore aimed to test whether there was a reduction in *Id1*, *Id2* or *Id3* transcripts, which lie downstream of this pathway. To do this we compared the relative transcript levels in purified retinal ECs of *Acvr11*-iKO<sup>e</sup> mutants and controls using a custom SABiosciences qPCR array. First, we established a method to reproducibly purify neonatal retinal endothelial cells and confirmed endothelial cell enrichment using rtPCR for pan endothe-

lial markers *Cdh5* and *CD31* (Figure 5D). Retinal ECs were then used to evaluate changes in expression of a range of genes (Table S1) that had either been reported to be dysregulated following loss of *Acvr11* [10,21] or were downstream of BMP9 signalling [22–24] or were associated with a related phenotype. Of the 85 candidate genes tested, 14 were found to be significantly down-regulated by over 50%, but no genes were up regulated (Table 1). *Acvr11* transcripts were reduced by 5.7 fold, consistent with efficient gene knockdown, and *Id3* (but not *Id1* or *Id2*) was downregulated 3.6-fold, in agreement with the observed reduction in pSmad1/5/8 activity. Expression of *Notch1* and *Flt1* were reduced in line with the altered tip cell phenotype [25,26], and the vasoregulators *eNOS* and *Ptgs2* were also downregulated. Reduced expression of three key transcription factors, *FoxC1*, *FoxC2* and *Sox17*, each with known roles in the regulation of angiogenesis [27,28], was

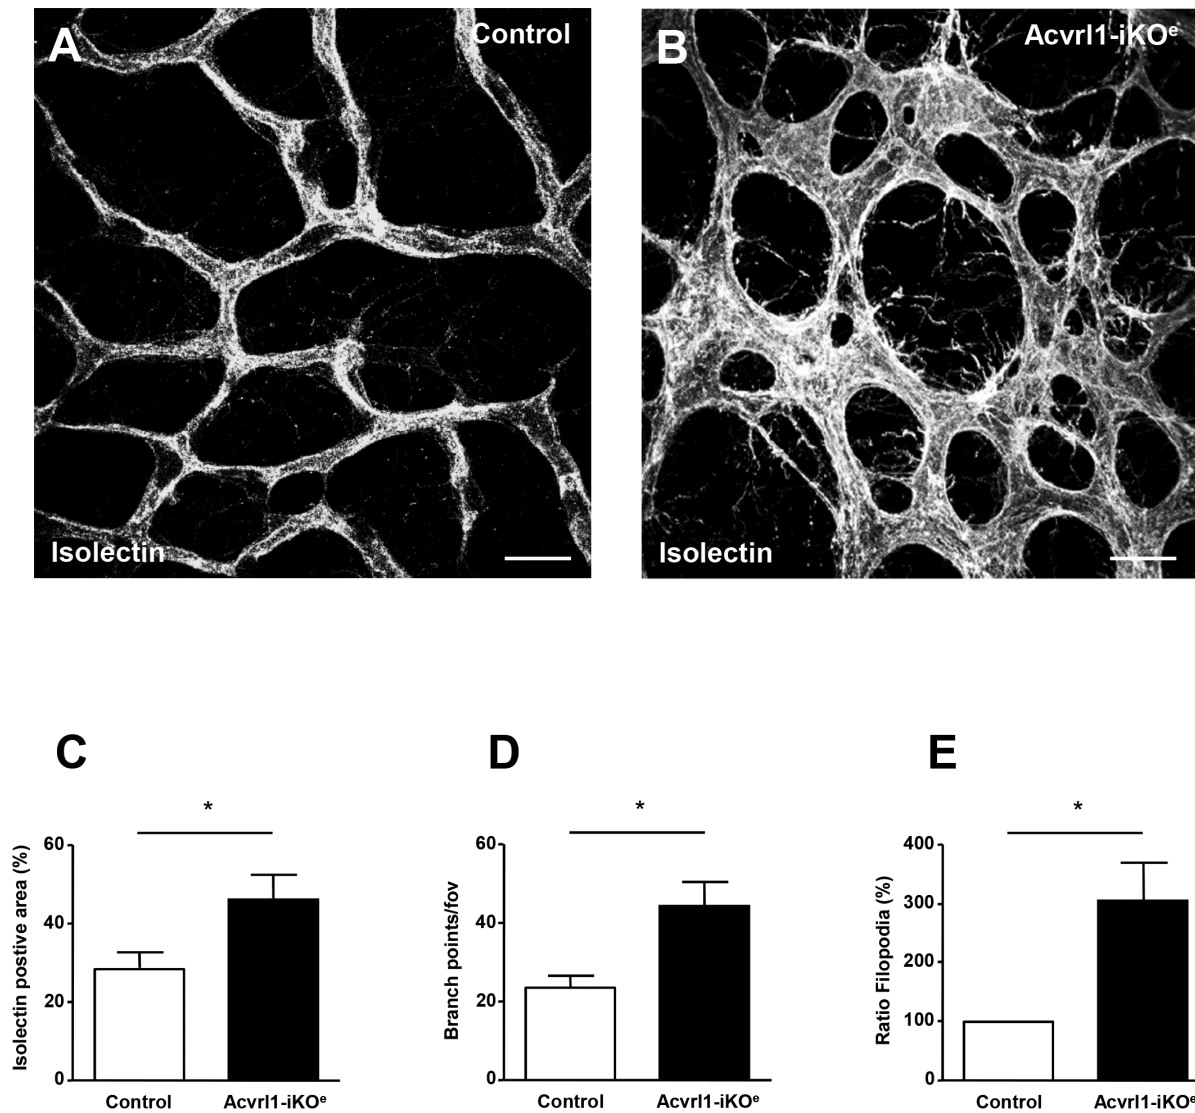

**Figure 2. Hypervascularity of the Acvrl1-iKO<sup>e</sup> retinal plexus.** Neonatal Acvrl1-iKO<sup>e</sup> retinas show increased vascular branching compared with controls (A,B). Vessel density (C), vessel branch points (D), and density of filopodia (E) are all significantly increased in Acvrl1-iKO<sup>e</sup> retinas (P6) compared with controls. \* $p < 0.05$ . Scale bar = 25  $\mu$ m. doi:10.1371/journal.pone.0098646.g002

also observed. However, at 33-fold reduction, endoglin was the most dramatically downregulated transcript in the array. Endoglin depletion in Acvrl1-iKO<sup>e</sup> neonatal retinas was confirmed at the protein level and was particularly evident in capillary ECs of the retina (Figure 6A–F). This effect was also seen in other tissues: analysis of neonatal pulmonary ECs from Acvrl1-iKO<sup>e</sup> and control mice confirmed reduced endoglin expression following depletion of Acvrl1 (Figure 6 G–L).

#### Endothelial specific depletion of Acvrl1 in adult life leads to caecal haemorrhage

To investigate the role of Acvrl1 in ECs in adult life, we also examined the vasculature of adult retinas following EC-specific depletion of Acvrl1 in mice aged between 10 and 12 weeks. Loss of Acvrl1 in adult retinal ECs had no detectable effect on vessel organisation or vessel branching, consistent with a requirement for angiogenesis to generate AVMs (Figure S3). However,

approximately 10 days after Acvrl1 depletion was initiated, these mice developed severe GI bleeding, evident as black faeces (Figure S4) in a similar way to previously reported for the ubiquitous Acvrl1 knockout mouse [7]. Post mortem examination at day 11 revealed the source of bleeding was located to fragile microvessels in the villi of the caecum (Figure S4). To investigate the effect of blood loss on oxygen transport to the peripheral vasculature, mice were monitored pre- and post- tamoxifen treatment for oxygen saturation which was found to be significantly reduced at day 11 compared with controls (Figure S4). Cardiac (left ventricle) blood parameters were measured at day 11 and the mean haematocrit level was 35.6% of packed cell volume in control mice but was significantly reduced to 13.2% ( $p < 0.01$ ) in Acvrl1-iKO<sup>e</sup> mice. Similarly, the mean haemoglobin levels were 12 g/dL in controls, but only 4.5 g/dL in the Acvrl1-iKO<sup>e</sup> ( $p < 0.01$ ), suggesting that haemorrhage was the major cause of low peripheral oxygen saturation (Table S2). However, blood gas analysis of cardiac left



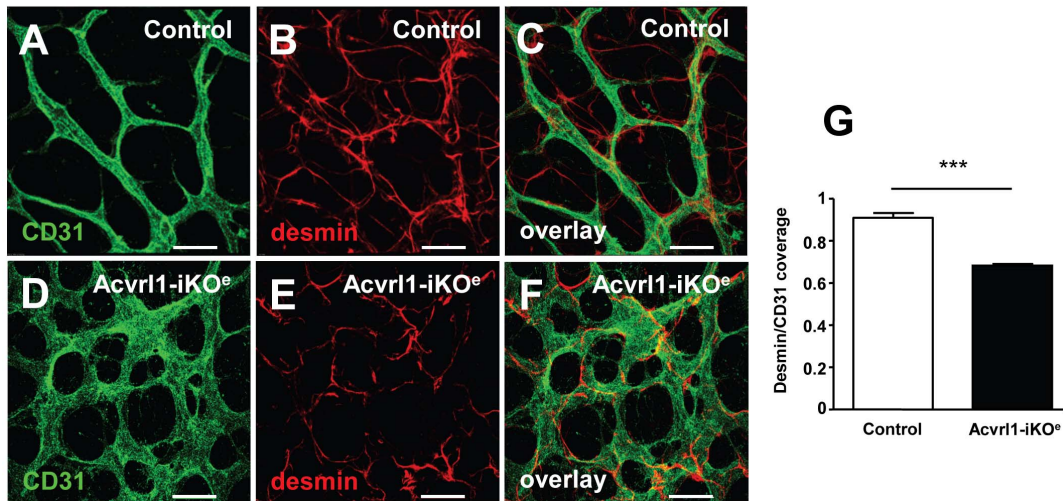

**Figure 3. Reduced pericyte coverage of capillaries in neonatal Acvr11-iKO<sup>e</sup> retinas.** Desmin staining revealed that pericyte coverage of capillaries in Acvr11-iKO<sup>e</sup> retinas (D–F) was reduced compared with controls (A–C). Quantitation of the ratio of desmin to CD31 staining confirmed that the increased endothelial cell density in Acvr11-iKO<sup>e</sup> retinas was not accompanied by an equivalent increase in pericyte density (G). \* $p < 0.05$ ; \*\*\* $p < 0.001$ . Scale bar = 20  $\mu\text{m}$  A,B; 25  $\mu\text{m}$  D–F. doi:10.1371/journal.pone.0098646.g003

ventricular blood from Acvr11-iKO<sup>e</sup> mutants showed that the oxygen saturation was unchanged (Table S2), suggesting that pulmonary AVMs were either absent or asymptomatic *in vivo*.

## Discussion

We have shown that loss of Acvr11 from ECs in neonates leads to a significant increase in vessel branching and increased numbers

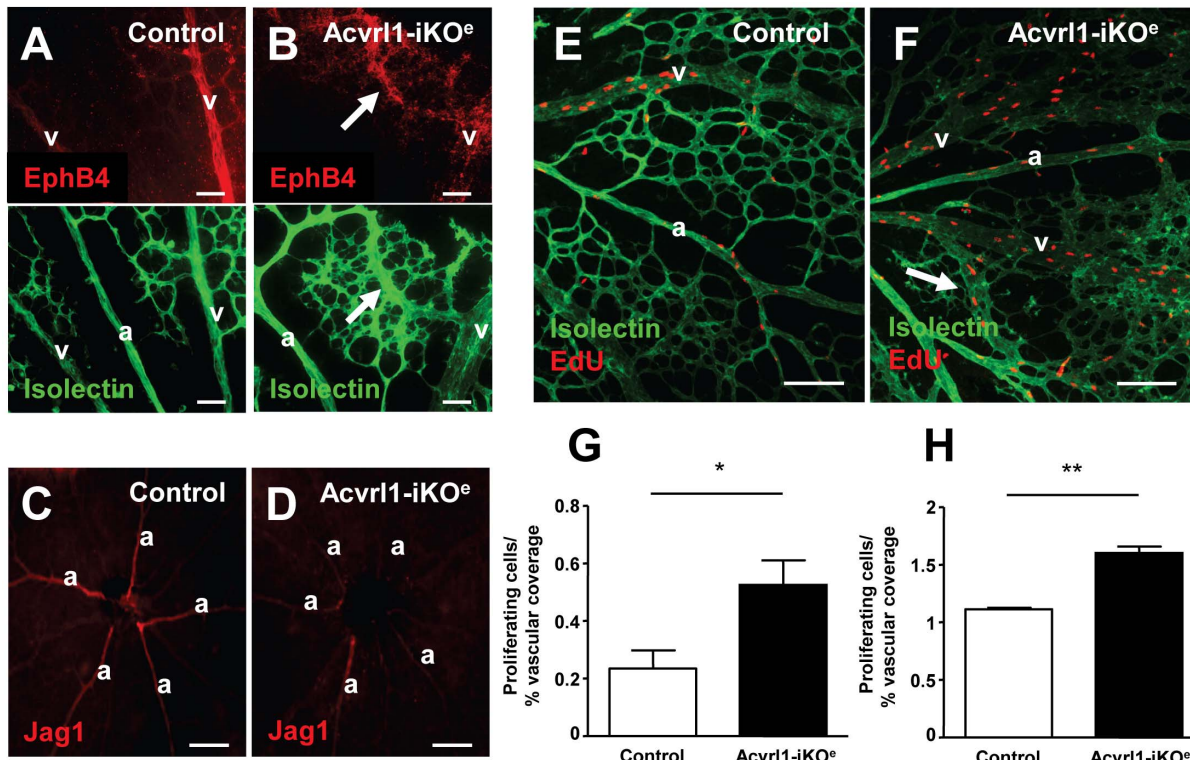

**Figure 4. Loss of arterial identity and increased EC proliferation in neonatal Acvr11-iKO<sup>e</sup> retinas.** Retinal veins show retention of venous marker EphB4 similar to control (A,B) and AVMs are also EphB4 positive (arrow, B). Jag1 expression in arteries of Acvr11-iKO<sup>e</sup> retinas is reduced compared with controls (C,D). EdU labelling (E,F) reveals a significant increase in EC proliferation in mid plexus capillaries (G) and veins (H) of Acvr11-iKO<sup>e</sup> retinas compared with controls. Increased EC proliferation is also associated with AVMs in Acvr11-iKO<sup>e</sup> mutants (arrow, F). \* $p < 0.05$ ; \*\* $p < 0.01$ . Scale bar = 50  $\mu\text{m}$  A and B; 200  $\mu\text{m}$  C and D; 100  $\mu\text{m}$  E and F. doi:10.1371/journal.pone.0098646.g004

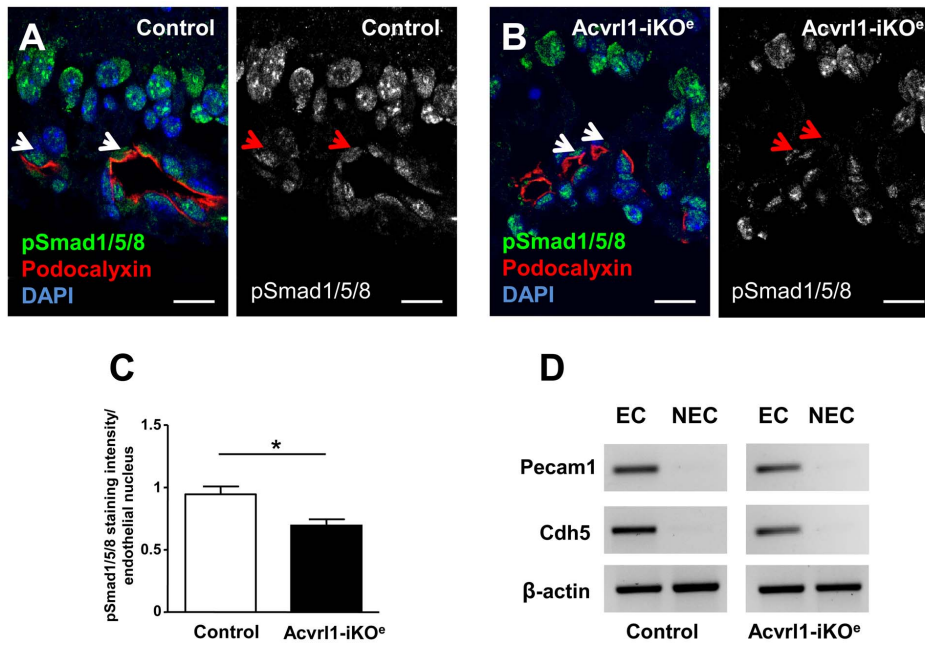

**Figure 5. Reduced pSmad1/5/8 activity and loss of endoglin expression in endothelial cells of neonatal *Acvrl1*-iKO<sup>e</sup> retinas.** Retinal sections stained for pSmad1/5/8 (green) reveal Smad1/5/8 activation in vascular cells and neural cells in control retinas (A). Confocal analysis of podocalyxin staining (red) was used to identify the apical surface of endothelial cells in retinal blood vessels. Reduced pSmad1/5/8 staining can be seen in endothelial cells in *Acvrl1*-iKO<sup>e</sup> retinas (B), and was quantified using confocal software. Statistical analysis of pSmad1/5/8 staining intensity shows a significant reduction in endothelial cells of *Acvrl1*-iKO<sup>e</sup> mutants compared with controls (C). Expression of pan-endothelial markers by rtPCR was used to confirm retinal endothelial cell (EC) purification by antibody conjugated magnetic beads. *Pecam1* and *Cdh5* were detected in the cDNA prepared from EC fractions compared to the non-EC (N-EC) fractions prepared from *Acvrl1*-iKO<sup>e</sup> and control retinas. Expression of  $\beta$ -actin was used as a positive control.

doi:10.1371/journal.pone.0098646.g005

of tip cells in the angiogenic neonatal retinal plexus, similar to the retinal phenotype observed when an ACVRL1 ligand trap was used to reduce *Acvrl1* signalling [11]. This hyperbranching phenotype was also observed following depletion of BMP10 in retinas of the BMP9 null mouse [29], pointing to BMP9 and BMP10 as the activating ligands for *Acvrl1* signalling *in vivo*. Furthermore, increased numbers of tip cells and hyperbranching resulted from endothelial-specific depletion of Smad1 and Smad5 in developing embryos [30]. In agreement with this, we observed that neonatal *Acvrl1*-iKO<sup>e</sup> retinas also showed reduced endothelial pSmad1/5/8 levels. Taken together, these findings are mutually supportive and consistent with BMP9/10 signalling through *Acvrl1* to activate Smad1/5/8 to synergise with Notch signalling. This acts to minimise tip cell formation in the stalk and phalanx ECs during angiogenesis *in vivo* [11,30,31]. In addition, our data suggests that *Acvrl1* activity would also affect Notch signalling by regulating Notch1 and Jag1 expression.

The interaction of *Acvrl1* and Notch signalling defects during the development of AVMs is less clear. Firstly, both loss and gain of Notch signalling can lead to AVM formation. For example, Notch mutant embryos develop AVMs, thought to be due to fusions of veins and arteries following loss of arterial and venous identity [32]. On the other hand, upregulation of Notch4 or Notch1 signalling also leads to AVM formation [33,34]. However, AVMs that develop following increased Notch4 signalling are reversible once excessive Notch signalling is normalised [34], but it remains to be determined to what extent the reversible AVMs are a feature of arteriovenous fusion, dysregulated vascular smooth muscle tone or excess endothelial cell proliferation. In HHT, it is not clear whether AVMs form as a result of lost arteriovenous identity. From analysis of the mouse models we can say that AVMs

are a feature of *Eng*-iKO<sup>e</sup> retinas where arteriovenous identity was maintained. In contrast, the *Acvrl1*-iKO<sup>e</sup> mutant retinas show a striking reduction in arterial *Jag1* expression. This finding is consistent with a previous report showing that *Jag1* expression is regulated by BMP9 [22] and agrees with the loss of arterial identity that was first reported in *Acvrl1* null mouse embryos [35]. In contrast, venous identity is preserved, as judged by retention of *EphB4* expression in the *Acvrl1*-iKO<sup>e</sup> retinal veins. Furthermore, AVMs in the *Acvrl1*-iKO<sup>e</sup> neonatal retinas also expressed *EphB4*, consistent with a venous identity for these arteriovenous connections. In contrast to a previous report [7] we observed that loss of endothelial *Acvrl1* did not lead to detectable loss of vascular smooth muscle cells. This difference is likely to be because we are only examining events that occur within 40 hours of tamoxifen treatment, whereas the previous study involved *Acvrl1* depletion from approximately E17 to P3 providing more opportunity for pulmonary vessel remodelling to occur [7]. However, we did confirm the microvessel haemorrhage seen in the postnatal lungs following loss of *Acvrl1* [7], demonstrating the endothelial cause of this fragility defect.

The majority of HHT patients carry mutations in either endoglin (HHT type 1) or *ACVRL1* (HHT type 2) genes [5,36]. Retinal vascular malformations have been reported in HHT patients although they are not considered a major clinical problem [37,38]. Both HHT type 1 and HHT type 2 patient groups have a similar clinical presentation, suggesting that endoglin and *ACVRL1* perform a similar function. Endoglin is a co-receptor for the TGF $\beta$  superfamily, has a high binding affinity for BMP9 [39,40], and promotes signalling through *ACVRL1* [41]. Examination of the neonatal retinal plexus following loss of endothelial endoglin (*Eng*-iKO<sup>e</sup>) [12] or *Acvrl1* (this study) has revealed



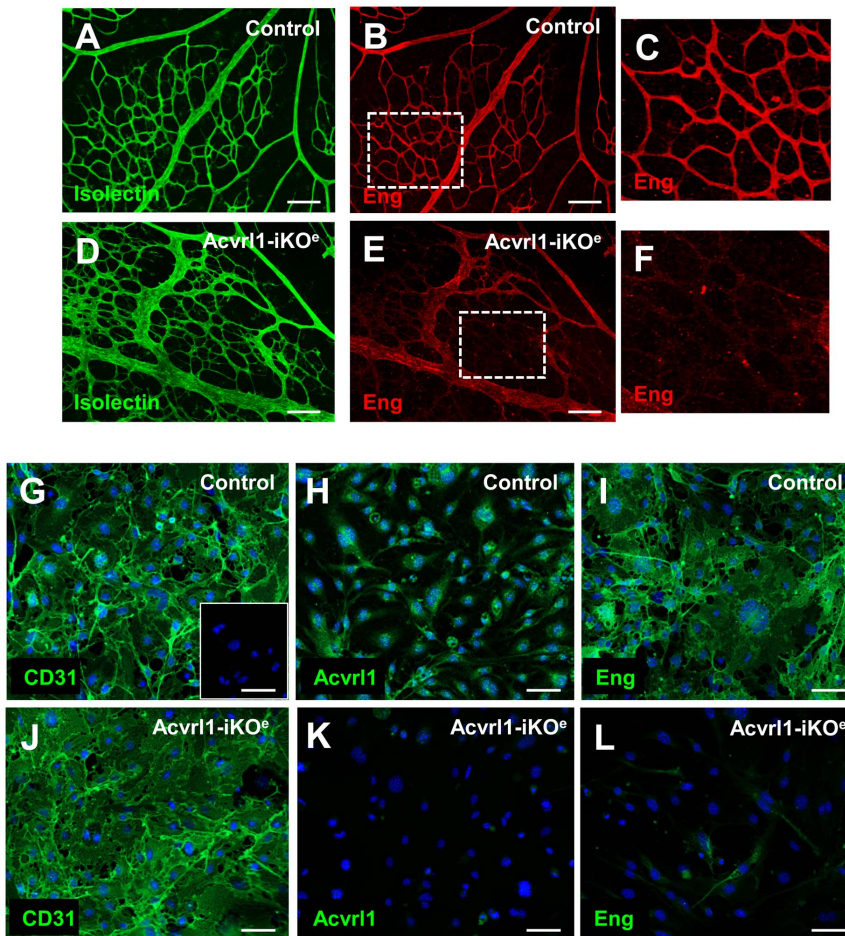

**Figure 6. Endothelial cells from *Acvr11-iKO*<sup>e</sup> mice show loss of endoglin expression.** Endoglin expression was reduced in *Acvr11-iKO*<sup>e</sup> retinas (E) compared with controls (B) and this was particularly marked in the capillaries. Representative capillary regions indicated in B and E are shown in digital zoom in C and F, respectively. \**p*<0.05. Scale bar = 20 μm A–B; 100 μm D,E,F,H. Purified lung endothelial cells from control (*Acvr11*<sup>fl/fl</sup>) and *Acvr11-iKO*<sup>e</sup> neonatal mice were immunostained for the pan endothelial marker CD31 to confirm endothelial cell purity (G,J). Cells from the *Acvr11-iKO*<sup>e</sup> mice showed not only loss of *Acvr11* protein (K), but also reduced endoglin expression (L) compared with controls (I). Dapi was used to stain cell nuclei and inset in G shows no primary antibody control. Scale bar = 50 μm.  
doi:10.1371/journal.pone.0098646.g006

interesting similarities and differences. In both cases, increased endothelial cell proliferation contributed to the AVMs, which also showed venous identity. The AVMs developed in a similar way but there was no loss of arterial identity in the *Eng-iKO*<sup>e</sup>, suggesting that loss of arterial or venous identity is not a prerequisite for AVM formation in HHT. Furthermore, *Eng-iKO*<sup>e</sup> retinas differed from *Acvr11-iKO*<sup>e</sup> retinas in that they did not exhibit hyperbranching or show altered pSmad1/5/8 levels, suggesting that some BMP9/10 signalling was preserved in the absence of endothelial endoglin, and consistent with the role of endoglin as a facilitator of ligand binding, rather than being essential for signalling. Furthermore, loss of endothelial *Acvr11* in our study leads to a rapid lethality, which appeared to be due to microhaemorrhage of the lung, whereas *Eng-iKO*<sup>e</sup> neonates are viable.

There was a striking reduction of endoglin expression in *Acvr11-iKO*<sup>e</sup> mice so that reduced endoglin expression is a common feature of both *Eng-iKO*<sup>e</sup> and *Acvr11-iKO*<sup>e</sup> genotypes. This finding agrees with the reduced endoglin expression previously reported in blood outgrowth ECs and in activated monocytes from HHT type 2 patients [21,42], although endoglin expression did not appear to be reduced in HUVECs or activated monocytes

from HHT2 patients in an earlier study [43]. As endoglin expression is downstream of BMP9/10 signalling, [22–24] then reduced *Acvr11* activity would explain the decrease in endoglin expression. This finding is compatible with a positive feedback loop: endoglin promotes *Acvr11* signalling [41] and is also expressed downstream of *Acvr11* signalling. We observed no reciprocal downregulation of *Acvr11* expression in *Eng-iKO*<sup>e</sup> mutants (data not shown). Together these findings suggest that BMP9/10 signalling is not sufficiently disturbed to reduce pSmad1/5/8 in *Eng-iKO*<sup>e</sup> mice and that *Acvr11* is more critical for BMP9/10 signalling *in vivo*. Figure 7 shows a diagrammatic summary of the disrupted signalling pathway in *Acvr11-iKO*<sup>e</sup> and *Eng-iKO*<sup>e</sup> mice. Intriguingly, it is also possible that the features common to both *Eng-iKO*<sup>e</sup> and *Acvr11-iKO*<sup>e</sup> phenotypes such as AVM formation (summarised in Table 2) may be primarily due to loss of endoglin. This hypothesis could be tested in future studies by restoring endoglin expression to *Acvr11-iKO*<sup>e</sup> mice using a transgenic or related approach.

In addition to *Acvr11* and endoglin, 83 candidate genes were examined for changes in transcript levels in *Acvr11-iKO*<sup>e</sup> retinal ECs (Table S1) and 12 of these genes were downregulated. Reduced *Notch1* expression may contribute to decreased Notch



**Table 1.** Changes in transcript levels in ECs following knockdown of Acvrl1 expression.

| Gene          | Fold Down-regulation | P value | Potential Role                                                                                 | Reference |
|---------------|----------------------|---------|------------------------------------------------------------------------------------------------|-----------|
| <i>Acvrl1</i> | 5.7                  | 0.0029  | Target gene                                                                                    |           |
| <i>Eng</i>    | 33.4                 | 0.0029  | Endoglin promotes Acvrl1 signalling                                                            | [41]      |
| <i>Id3</i>    | 3.59                 | 0.038   | Transcription factor downstream of pSmad1/5 signalling                                         | [41]      |
| <i>FoxC1</i>  | 4.61                 | 0.038   | Regulate angiogenesis and lymphangiogenesis                                                    | [27]      |
| <i>FoxC2</i>  | 2.97                 | 0.011   |                                                                                                |           |
| <i>Fzd4</i>   | 3.04                 | 0.038   | Involved in neural angiogenesis                                                                | [28]      |
| <i>Sox17</i>  | 2.29                 | 0.011   |                                                                                                |           |
| <i>Lrp5</i>   | 1.8                  | 0.029   |                                                                                                |           |
| <i>Nos3</i>   | 2.42                 | 0.033   | Regulate vascular tone, downregulated in endoglin mutants.                                     | [46,47]   |
| <i>Ptgs2</i>  | 1.9                  | 0.004   |                                                                                                |           |
| <i>Sele</i>   | 1.98                 | 0.011   | Regulated by BMP9 and involved in leucocyte interactions with ECs.                             | [24]      |
| <i>Flt1</i>   | 1.57                 | 0.032   | Production of sFlt1 a 'ligand sink' for VEGFA, required for efficient lateral Notch signalling | [53]      |
| <i>VegfC</i>  | 3.82                 | 0.0075  | Regulates lymphangiogenesis.                                                                   | [54]      |
| <i>Notch1</i> | 3.95                 | 0.036   | Regulates tip cell-stalk cell phenotype in angiogenesis                                        | [25]      |

Quantitative PCR using a custom array of 85 genes involved in angiogenesis revealed changes in transcript levels of the 14 listed genes.  
doi:10.1371/journal.pone.0098646.t001

signalling in these retinas [25], but we were unable to detect a significant change in transcript levels of the Notch immediate downstream effector genes, *Hes1* and *Hey1* *in vivo*. However, we did observe reduced *VegfC* levels that may also contribute to the lymphangiogenesis defects seen in mice treated with an *Acvrl1* ligand trap [44]. Further studies comparing vascular-specific and lymphatic-specific *Acvrl1* knockouts are required in order to determine their relative contributions to *VegfC* transcript levels.

Furthermore, expression of *FoxC1* and *FoxC2*, which encode transcription factors involved in regulation of angiogenesis upstream of Notch, are also reduced in *Acvrl1*-iKO<sup>e</sup> retinas and may contribute to Notch signalling defects. Moreover, *FoxC2* is regulated by BMP9 and plays a role in lymphatic development [45]. It is also relevant here that compound knockouts for *FoxC1* and *FoxC2* transcription factors result in mouse embryos with AVMs resulting from a fusion of veins and arteries similar to those

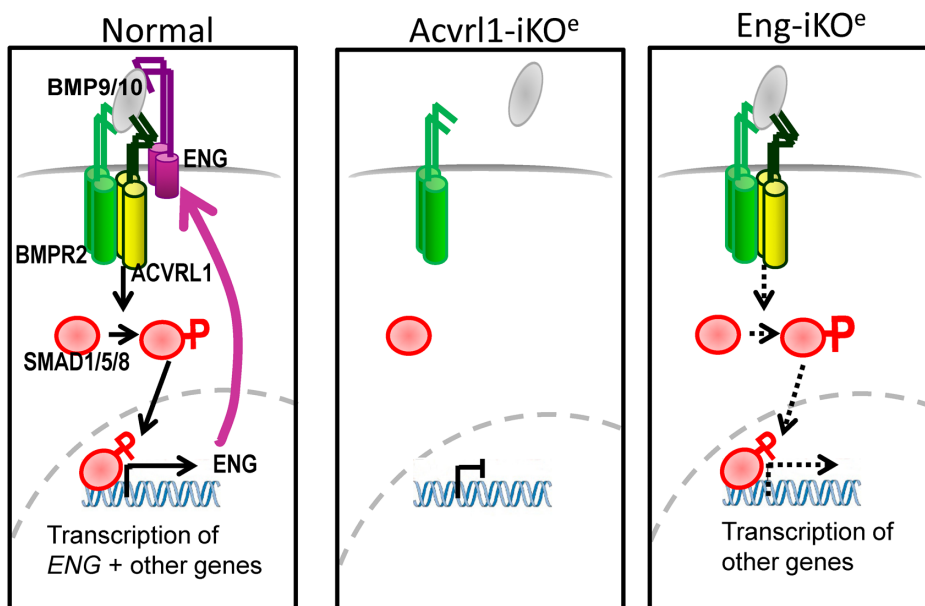

**Figure 7. Diagrammatic Summary of Normal and Disrupted Signalling following Acvrl1 Depletion in Endothelial Cells.** In normal endothelial cells endoglin promotes BMP9/10 signalling through the ACVRL1/BMPR2 receptor complex (as well as the ACVRL1/TGFBR2 complex, not shown). ACVRL1 phosphorylates SMAD1/5/8 which is then able to move to the nucleus (in combination with SMAD4) to regulate downstream expression of many genes. BMP9 signalling leads to increased endoglin expression [22–24] which in turn promotes ACVRL1 signalling in a positive feedback loop. In the absence of ACVRL1, Smad1/5/8 signalling is reduced and endoglin is no longer expressed. On the other hand, when endoglin is depleted from endothelial cells, residual signalling through *Acvrl1* is able to proceed, but at a lower efficiency.  
doi:10.1371/journal.pone.0098646.g007

**Table 2.** Summary of key differences in the neonatal retinal vascular plexus when either Acvrl1 or Eng is depleted from endothelial cells.

| Phenotype                                    | Acvrl1-iKO <sup>e</sup>       | *Eng-iKO <sup>e</sup>         |
|----------------------------------------------|-------------------------------|-------------------------------|
| AVMs                                         | Present                       | Present                       |
| Vessel Branching                             | Increased                     | Increased only at periphery   |
| Angiogenesis Delay                           | No                            | Yes                           |
| Venous Identity                              | Preserved, but veins enlarged | Preserved, but veins enlarged |
| Arterial Identity                            | Reduced                       | Preserved                     |
| Endothelial Cell Proliferation               | Increased                     | Increased                     |
| Smad1/5 Phosphorylation in Endothelial Cells | Reduced                       | No change detected            |

NB All relative terms (eg 'increased' and 'reduced') are used with respect to these features in normal (control) retina. \*See reference [12] for further details of the Eng-iKO<sup>e</sup> phenotype.

doi:10.1371/journal.pone.0098646.t002

seen in Acvrl1 null embryos [27,35]. Levels of eNos and Ptg2 (also known as Cox2) transcripts were downregulated 2.4 and 1.9 fold, respectively, in Acvrl1-iKO<sup>e</sup> retinal ECs. These genes are both involved in vasomotor control and have been reported as reduced in Endoglin deficient mice [46,47]. We also observed reduced pericyte coverage of the Acvrl1-iKO<sup>e</sup> retinal capillaries, similar to a previous report describing local Acvrl1 depletion in adult cerebral vessels exposed to angiogenic stimuli [48]. However, we detected no significant reduction in Pdgfb expression in our custom array analysis (not shown), so the pericyte defects in our model may therefore relate to the increased proliferative status of the Acvrl1-iKO<sup>e</sup> ECs rather than defects in Pdgf signalling.

In contrast to neonatal Acvrl1-iKO<sup>e</sup> mice, no AVMs were detected in retinas of adult Acvrl1-iKO<sup>e</sup> mice, consistent with our hypothesis of angiogenesis-dependent AVM formation. However, bleeding from the caecum, a pouch like structure that lies between the ileum and colon, was sufficiently severe to cause a fatal anaemia. Even though the caecum is much smaller in human than mouse, caecal AVMs have been reported in HHT [49] although GI bleeding in HHT patients is more frequently associated with the stomach and upper duodenum [50]. It is not clear why different vascular beds are susceptible to bleeding in HHT, but loss of endothelial Acvrl1 in the mouse leads to increased vessel fragility even in fully formed vessels of the adult caecum, whereas AVM formation in the retina occurs only in the context of developmental angiogenesis and vessel remodelling.

In conclusion, this study reveals the importance of endothelial Acvrl1 signalling in regulating vascular branching and endothelial cell proliferation during angiogenesis in vivo. We also confirm the angiogenesis dependence of AVM formation. In adult HHT patients, inflammation is likely to be the most frequent trigger of angiogenic responses, and therefore anti-inflammatory drugs may play a protective role in controlling lesion development. Our findings also impact on the wider role of ACVRL1 in regulating cardiovascular pathophysiology [51] and the development of anti-ACVRL1 therapies[52] for treating cancer patients.

## Supporting Information

**Figure S1 Lung defects in neonatal Acvrl1-iKO<sup>e</sup> mice.** H&E stained lung sections show extensive haemorrhage in the lung capillaries of Acvrl1-iKO<sup>e</sup> pups at P6 (B) compared with age matched controls (A). However there was no detectable loss of supporting vascular smooth muscle cells in the pulmonary blood vessels (B,C). Lung vasculature was revealed using isolectin staining (green) and smooth muscle cells were detected using

anti-alpha smooth muscle actin (aSMA, red). Abbreviations: a, artery; br, bronchiole; v, vein. Scale bar = 100 um.

(TIF)

**Figure S2 No reduction in progression of the retinal vascular plexus in neonatal Acvrl1-iKO<sup>e</sup> retinas.** The relative distance covered by the vascular plexus was calculated as the ratio of the vascular radius, indicated by the blue arrow, and the retinal radius, indicated by the red arrow in 3 separate regions for each retina. The size of each retina was calculated as the mean of the retinal radii and mean values are shown +/- standard error. Scale bar = 500 um.

(TIF)

**Figure S3 Normal vasculature of adult Acvrl1-iKO<sup>e</sup> retinas.** No vascular abnormalities were detected in vessels from Acvrl1-iKO<sup>e</sup> (D–E) adult retinas compared with control retinas (A–C). Acvrl1 was depleted in endothelial cells during adult life and retinas were stained for vascular smooth muscle cells using anti-aSMA (red) and for ECs with isolectin (green). Scale bar = 500 um.

(TIF)

**Figure S4 Adult Acvrl1-iKO<sup>e</sup> mice develop GI bleeding from the caecum.** Tamoxifen was given to adult mice (on day 1 and day 3 as indicated by black arrows) to generate Acvrl1-iKO<sup>e</sup> mice. Peripheral oxygen saturation was significantly reduced in Acvrl1-iKO<sup>e</sup> adult mice at day 11\* p<0.05 (A). GI bleeding was first observed by black faeces (inset in D), compare with normal faeces (inset in C), approximately 9 days after the first tamoxifen injection. Analysis of the GI tract showed bleeding was localised to the caecum, which appeared intensely dark coloured (D) compared with the caecum from control mice (C). Furthermore, the contents of the small intestine proximal to the caecum were normal in colour (asterisk in D), whilst the content of the large intestine immediately distal to the caecum was much darker indicating a significant blood content (arrow in D). H&E stained caecal sections revealed bleeding from fragile vessels in the caecal villi of adult Acvrl1-iKO<sup>e</sup> mice (arrows, F).

(TIF)

**Table S1 Genes used in custom array qPCR analysis to evaluate changes in transcription following loss of Acvrl1.** (\* indicates housekeeping genes used for data normalisation).

(DOCX)

**Table S2 Blood Gas Analysis of Acvrl1-iKO<sup>e</sup> Adult Mice.** Blood from adult male Acvrl1-iKO<sup>e</sup> and control mice (aged 12 weeks) was taken by cardiac puncture under terminal anaesthesia and analysed using a CG8+ cartridge with an Istat portable reader. Blood values are expressed as mean  $\pm$ SEM. (DOCX)

## Acknowledgments

We are grateful to Darroch Hall, Neil Hamilton and Steve Smith for technical help and to Lisa Hodgson for microscopy support.

## References

- Oh SP, Seki T, Goss KA, Imamura T, Yi Y, et al. (2000) Activin receptor-like kinase 1 modulates transforming growth factor-beta 1 signaling in the regulation of angiogenesis. *Proc Natl Acad Sci U S A* 97: 2626–2631.
- David L, Mallet C, Mazerbourg S, Feige JJ, Bailly S (2007) Identification of BMP9 and BMP10 as functional activators of the orphan activin receptor-like kinase 1 (ALK1) in endothelial cells. *Blood* 109: 1953–1961.
- David L, Mallet C, Keramidis M, Lamande N, Gasc JM, et al. (2008) Bone Morphogenetic Protein-9 Is a Circulating Vascular Quiescence Factor. *Circ Res* 102: 914–922.
- Scharpfenecker M, van Dinther M, Liu Z, van Bezooijen RL, Zhao Q, et al. (2007) BMP-9 signals via ALK1 and inhibits bFGF-induced endothelial cell proliferation and VEGF-stimulated angiogenesis. *J Cell Sci* 120: 964–972.
- Johnson DW, Berg JN, Baldwin MA, Gallione CJ, Marondel I, et al. (1996) Mutations in the activin receptor-like kinase 1 gene in hereditary haemorrhagic telangiectasia type 2. *Nat Genet* 13: 189–195.
- Shovlin CL (2010) Hereditary haemorrhagic telangiectasia: pathophysiology, diagnosis and treatment. *Blood Rev* 24: 203–219.
- Park SO, Wankhede M, Lee YJ, Choi EJ, Fliess N, et al. (2009) Real-time imaging of de novo arteriovenous malformation in a mouse model of hereditary hemorrhagic telangiectasia. *J Clin Invest* 119: 3487–3496.
- Chen W, Sun Z, Han Z, Jun K, Camus M, et al. (2014) De novo cerebrovascular malformation in the adult mouse after endothelial Alk1 deletion and angiogenic stimulation. *Stroke* 45: 900–902.
- Roman BL, Pham VN, Lawson ND, Kulik M, Childs S, et al. (2002) Disruption of acvrl1 increases endothelial cell number in zebrafish cranial vessels. *Development* 129: 3009–3019.
- Corti P, Young S, Chen CY, Patrick MJ, Rochon ER, et al. (2011) Interaction between alk1 and blood flow in the development of arteriovenous malformations. *Development* 138: 1573–1582.
- Larrivee B, Prahst C, Gordon E, del Toro R, Mathivet T, et al. (2012) ALK1 signaling inhibits angiogenesis by cooperating with the Notch pathway. *Dev Cell* 22: 489–500.
- Mahmoud M, Allinson KR, Zhai Z, Oakenfull R, Ghandi P, et al. (2010) Pathogenesis of arteriovenous malformations in the absence of endoglin. *Circ Res* 106: 1425–1433.
- Wang Y, Nakayama M, Pitulescu ME, Schmidt TS, Bochenek ML, et al. (2010) Ephrin-B2 controls VEGF-induced angiogenesis and lymphangiogenesis. *Nature* 465: 483–486.
- Park SO, Lee YJ, Seki T, Hong KH, Fliess N, et al. (2008) ALK5- and TGFBR2-independent role of ALK1 in the pathogenesis of hereditary hemorrhagic telangiectasia type 2. *Blood* 111: 633–642.
- Lebrin F, Srun S, Raymond K, Martin S, van den Brink S, et al. (2010) Thalidomide stimulates vessel maturation and reduces epistaxis in individuals with hereditary hemorrhagic telangiectasia. *Nat Med* 16: 420–428.
- Tual-Chalot S, Allinson KR, Fruttiger M, Arthur HM (2013) Whole mount immunofluorescent staining of the neonatal mouse retina to investigate angiogenesis in vivo. *J Vis Exp*. 77: e50546.
- Pitulescu ME, Schmidt I, Bedito R, Adams RH (2010) Inducible gene targeting in the neonatal vasculature and analysis of retinal angiogenesis in mice. *Nat Protoc* 5: 1518–1534.
- Allinson KR, Lee HS, Fruttiger M, McCarty J, Arthur HM (2012) Endothelial expression of TGFbeta type II receptor is required to maintain vascular integrity during postnatal development of the central nervous system. *PLoS One* 7: e39336.
- Sobczak M, Dargatz J, Chrzanoska-Wodnicka M (2010) Isolation and culture of pulmonary endothelial cells from neonatal mice. *J Vis Exp*. 46: e2316.
- Fruttiger M (2007) Development of the retinal vasculature. *Angiogenesis* 10: 77–88.
- Fernandez LA, Sanz-Rodriguez F, Zarrabeitia R, Perez-Molino A, Heibel RP, et al. (2005) Blood outgrowth endothelial cells from Hereditary Haemorrhagic Telangiectasia patients reveal abnormalities compatible with vascular lesions. *Cardiovasc Res* 68: 235–248.
- Morikawa M, Koizumi D, Tsutsumi S, Vasilaki E, Kanki Y, et al. (2011) ChIP-seq reveals cell type-specific binding patterns of BMP-specific Smads and a novel binding motif. *Nucleic Acids Res* 39: 8712–8727.
- Young K, Conley B, Romero D, Tweedie E, O'Neill C, et al. (2012) BMP9 regulates endoglin-dependent chemokine responses in endothelial cells. *Blood* 120: 4263–4273.
- Upton PD, Davies RJ, Trembath RC, Morrell NW (2009) Bone morphogenetic protein (BMP) and activin type II receptors balance BMP9 signals mediated by activin receptor-like kinase-1 in human pulmonary artery endothelial cells. *J Biol Chem* 284: 15794–15804.
- Hellstrom M, Phng LK, Hofmann JJ, Wallgard E, Coultas L, et al. (2007) Dll4 signalling through Notch1 regulates formation of tip cells during angiogenesis. *Nature* 445: 776–780.
- Krueger J, Liu D, Scholz K, Zimmer A, Shi Y, et al. (2011) Flt1 acts as a negative regulator of tip cell formation and branching morphogenesis in the zebrafish embryo. *Development* 138: 2111–2120.
- Seo S, Fujita H, Nakano A, Kang M, Duarte A, et al. (2006) The forkhead transcription factors, Foxc1 and Foxc2, are required for arterial specification and lymphatic sprouting during vascular development. *Dev Biol* 294: 458–470.
- Ye X, Wang Y, Cahill H, Yu M, Badea TC, et al. (2009) Norrin, frizzled-4, and Lrp5 signaling in endothelial cells controls a genetic program for retinal vascularization. *Cell* 139: 285–298.
- Ricard N, Ciaia D, Levet S, Subileau M, Mallet C, et al. (2012) BMP9 and BMP10 are critical for postnatal retinal vascular remodeling. *Blood* 119: 6162–6171.
- Moya IM, Umans L, Maas E, Pereira PN, Beets K, et al. (2012) Stalk cell phenotype depends on integration of Notch and Smad1/5 signaling cascades. *Dev Cell* 22: 501–514.
- Itoh F, Itoh S, Goumans MJ, Valdimarsdottir G, Iso T, et al. (2004) Synergy and antagonism between Notch and BMP receptor signaling pathways in endothelial cells. *EMBO J* 23: 541–551.
- Krebs LT, Shutter JR, Tanigaki K, Honjo T, Stark KL, et al. (2004) Haploinsufficient lethality and formation of arteriovenous malformations in Notch pathway mutants. *Genes Dev* 18: 2469–2473.
- Krebs LT, Starling C, Chervonsky AV, Gridley T (2010) Notch1 activation in mice causes arteriovenous malformations phenocopied by ephrinB2 and EphB4 mutants. *Genesis* 48: 146–150.
- Murphy PA, Kim TN, Lu G, Bollen AW, Schaffer CB, et al. (2012) Notch4 normalization reduces blood vessel size in arteriovenous malformations. *Sci Transl Med* 4: 117ra8.
- Urness LD, Sorensen LK, Li DY (2000) Arteriovenous malformations in mice lacking activin receptor-like kinase-1. *Nat Genet* 26: 328–331.
- McAllister KA, Grogg KM, Johnson DW, Gallione CJ, Baldwin MA, et al. (1994) Endoglin, a TGF-beta binding protein of endothelial cells, is the gene for hereditary haemorrhagic telangiectasia type 1. *Nat Genet* 8: 345–351.
- Brant AM, Schachat AP, White RI (1989) Ocular manifestations in hereditary hemorrhagic telangiectasia (Rendu-Osler-Weber disease). *Am J Ophthalmol* 107: 642–646.
- Vase I, Vase P (1979) Ocular lesions in hereditary haemorrhagic telangiectasia. *Acta Ophthalmol (Copenh)* 57: 1084–1090.
- Castonguay R, Werner ED, Matthews RG, Presman E, Mulivor AW, et al. (2011) Soluble Endoglin Specifically Binds Bone Morphogenetic Proteins 9 and 10 via Its Orphan Domain, Inhibits Blood Vessel Formation, and Suppresses Tumor Growth. *J Biol Chem* 286: 30034–30046.
- Alt A, Miguel-Romero L, Donderis J, Aristorena M, Blanco FJ, et al. (2012) Structural and functional insights into endoglin ligand recognition and binding. *PLoS One* 7: e29948.
- Lebrin F, Goumans MJ, Jonker L, Carvalho RL, Valdimarsdottir G, et al. (2004) Endoglin promotes endothelial cell proliferation and TGF-beta/ALK1 signal transduction. *Embo J* 23: 4018–4028.
- Sanz-Rodriguez F, Fernandez LA, Zarrabeitia R, Perez-Molino A, Ramirez JR, et al. (2004) Mutation analysis in Spanish patients with hereditary hemorrhagic telangiectasia: deficient endoglin up-regulation in activated monocytes. *Clin Chem* 50: 2003–2011.
- Abdalla SA, Pece-Barbara N, Vera S, Tapia E, Paez E, et al. (2000) Analysis of ALK-1 and endoglin in newborns from families with hereditary hemorrhagic telangiectasia type 2. *Hum Mol Genet* 9: 1227–1237.
- Niessen K, Zhang G, Ridgway JB, Chen H, Yan M (2010) ALK1 signaling regulates early postnatal lymphatic vessel development. *Blood* 115: 1654–1661.

## Author Contributions

Conceived and designed the experiments: HMA MF SPO. Performed the experiments: STC MM RER ZZ KRA. Analyzed the data: STC MM HMA. Contributed reagents/materials/analysis tools: SPO. Wrote the paper: HMA STC.

45. Levet S, Ciaia D, Merdzhanova G, Mallet C, Zimmers TA, et al. (2013) Bone morphogenetic protein 9 (BMP9) controls lymphatic vessel maturation and valve formation. *Blood* 122: 598–607.
46. Jerkic M, Rivas-Elena JV, Prieto M, Carron R, Sanz-Rodriguez F, et al. (2004) Endoglin regulates nitric oxide-dependent vasodilatation. *FASEB J* 18: 609–611.
47. Mahmoud M, Borthwick G, Hislop A, Arthur H (2009) Endoglin and Activin Receptor-Like-Kinase 1 are Co-expressed in the Distal Vessels of the Lung. *Lab Invest.* 89: 15–25.
48. Chen W, Guo Y, Walker EJ, Shen F, Jun K, et al. (2013) Reduced Mural Cell Coverage and Impaired Vessel Integrity After Angiogenic Stimulation in the Alk1-deficient Brain. *Arterioscler Thromb Vasc Biol* 33: 305–310.
49. Siddiki H, Doherty MG, Fletcher JG, Stanson AW, Vrtiska TJ, et al. (2008) Abdominal findings in hereditary hemorrhagic telangiectasia: pictorial essay on 2D and 3D findings with isotropic multiphase CT. *Radiographics* 28: 171–184.
50. McDonald J, Bayrak-Toydemir P (2005) Hereditary hemorrhagic telangiectasia. *Haematologica* 90: 728–732.
51. Gonzalez-Nunez M, Munoz-Felix JM, Lopez-Novoa JM (2013) The ALK-1/Smad1 pathway in cardiovascular physiopathology. A new target for therapy? *Biochim Biophys Acta* 1832: 1492–1510.
52. Cunha SI, Pardali E, Thorikay M, Anderberg C, Hawinkels L, et al. (2010) Genetic and pharmacological targeting of activin receptor-like kinase 1 impairs tumor growth and angiogenesis. *J Exp Med* 207: 85–100.
53. Bautch VL (2012) VEGF-directed blood vessel patterning: from cells to organism. *Cold Spring Harb Perspect Med* 2: a006452.
54. Karkkainen MJ, Haiko P, Sainio K, Partanen J, Taipale J, et al. (2004) Vascular endothelial growth factor C is required for sprouting of the first lymphatic vessels from embryonic veins. *Nat Immunol* 5: 74–80.
